# Supplementary material
Source: PubMed Central journal article supplement (PMC4472497)
Supplement: NIHMS688075-supplement-Supp_FigureS1-S5.pdf [file NIHMS688075-supplement-Supp_FigureS1-S5.pdf]

## Peanut OIT Study Design

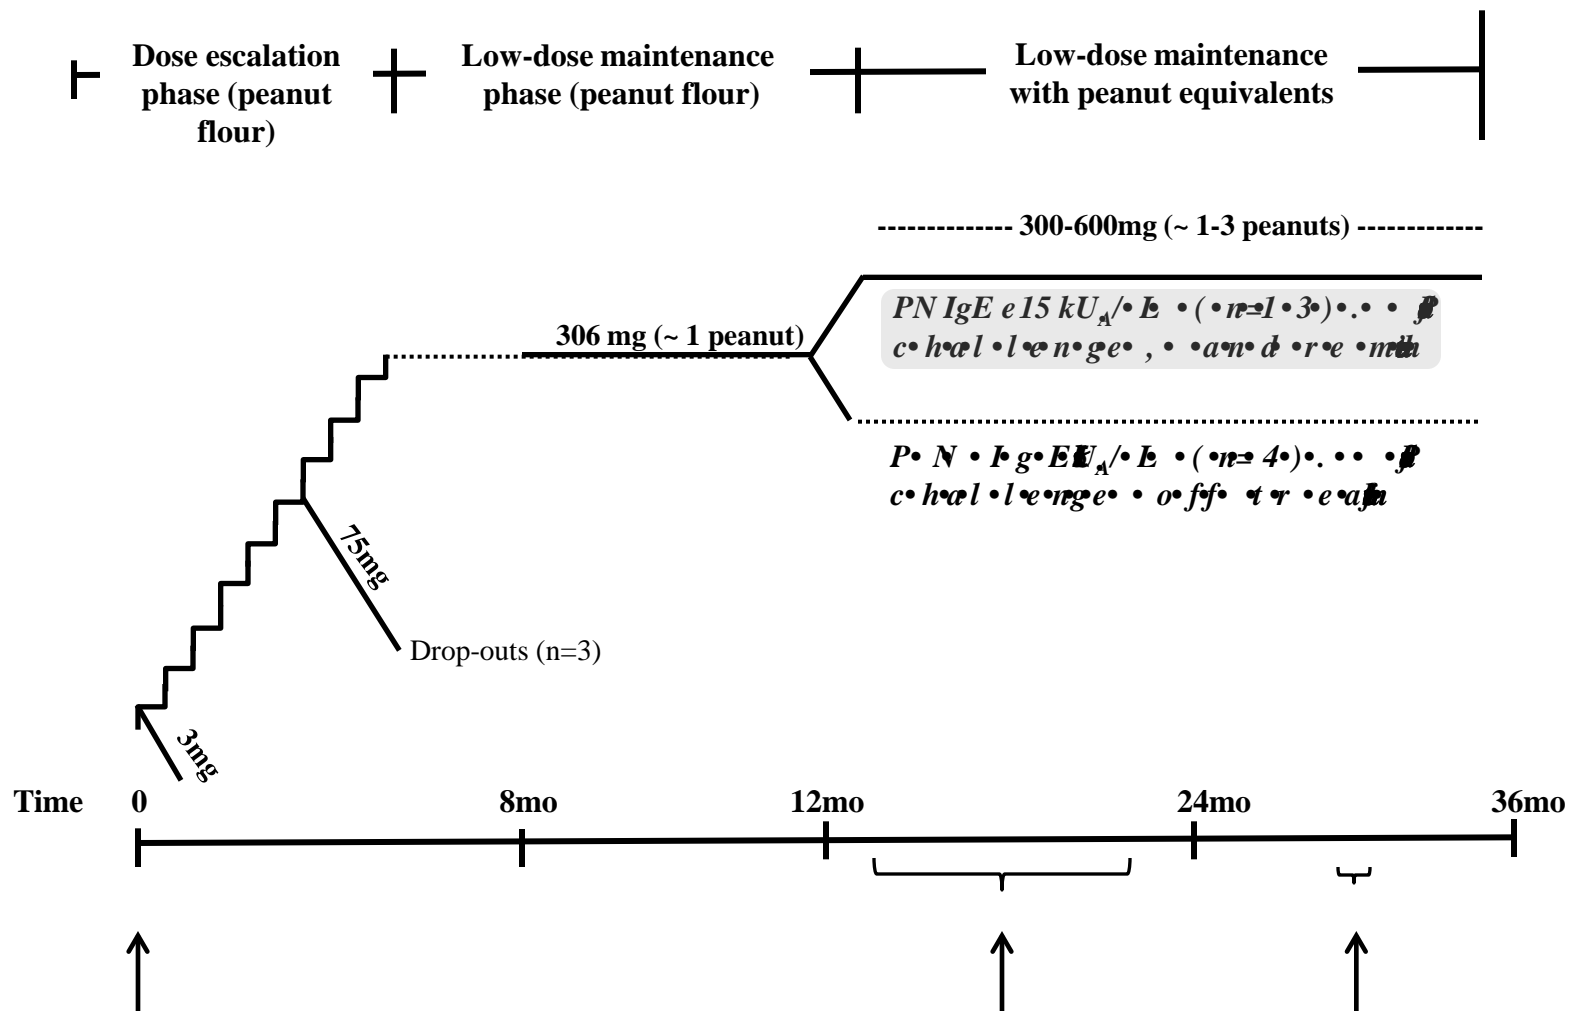

Figure S1

**Peanut IgE (kU<sub>A</sub>/L)**

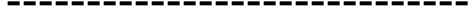

**Ara h 1 IgE (kU<sub>A</sub>/L)**

**Ara h 2 IgE (kU<sub>A</sub>/L)**

Figure S2

**A.**

CD3<sup>+</sup>CD8<sup>+</sup>T cells

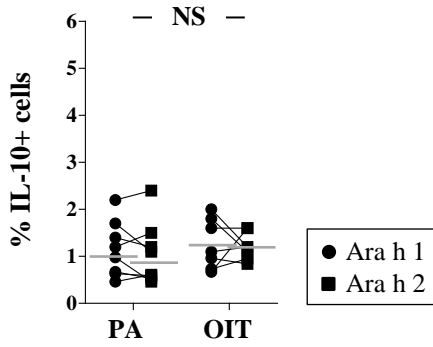

**B.**

CD3<sup>+</sup>CD8<sup>+</sup> T cell gate

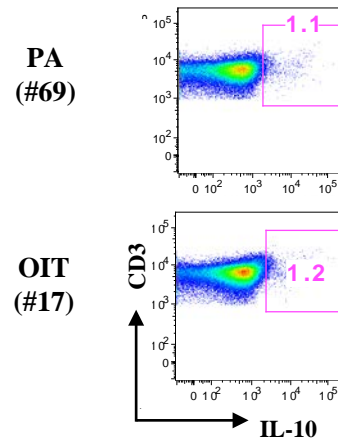

**A.** Ara h 1

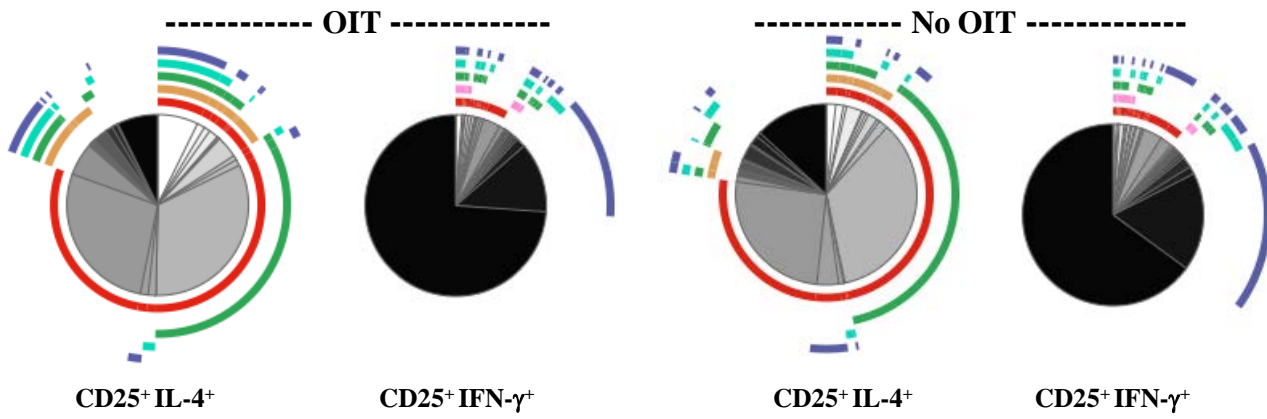

**B.** CD25<sup>+</sup>IFN-γ<sup>+</sup>

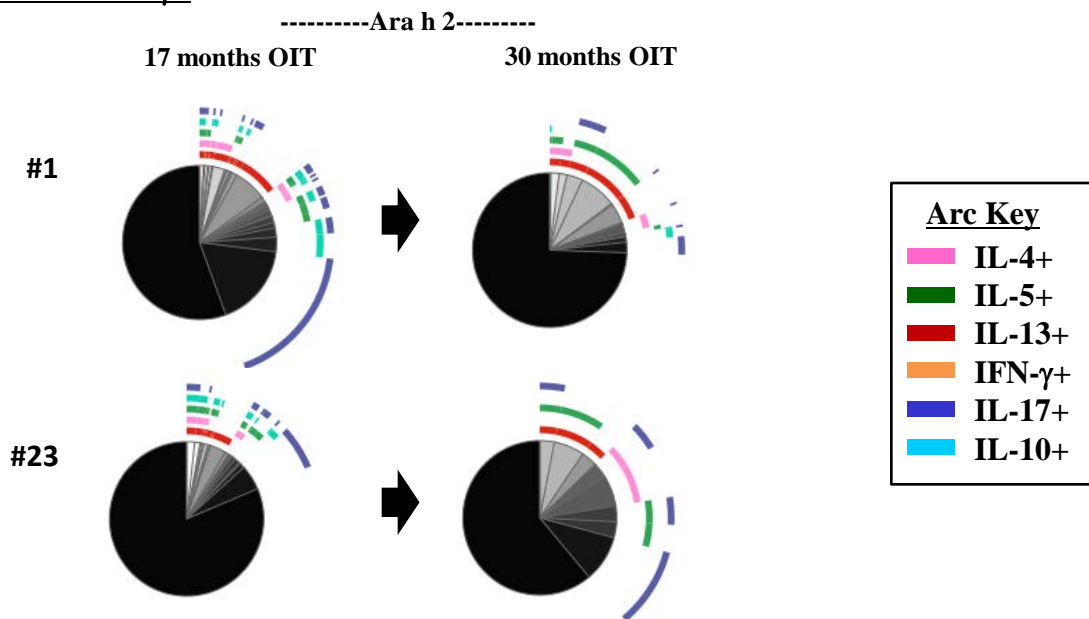

Figure S4

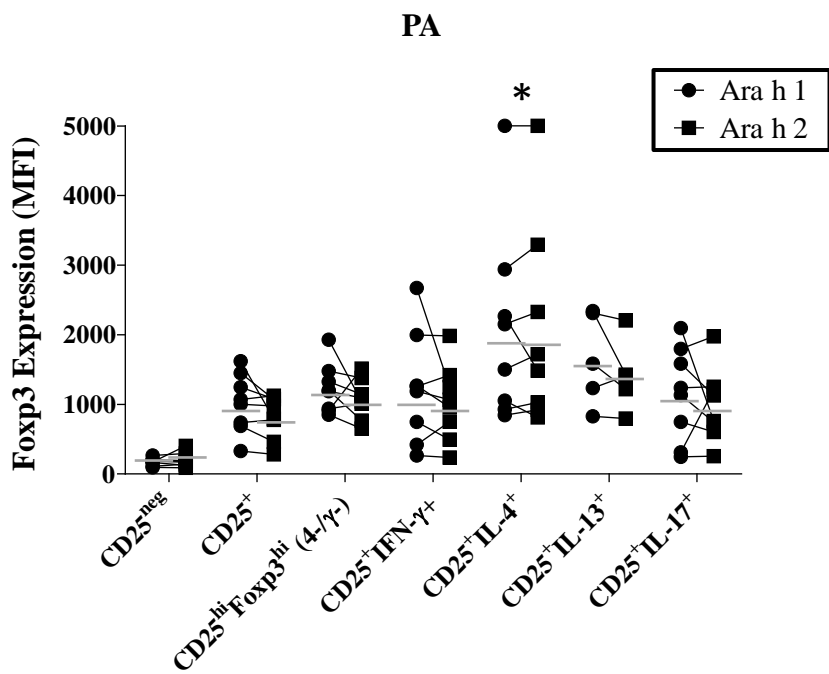

Figure S5
